# Supplementary material
Source: ML conference proceedings conference paper supplement (https://proceedings.neurips.cc/paper_files/paper/2021/hash/843a4d7fb5b1641b0bb8e3c2b2e75231-Abstract.html)
Supplement: Supplementary file 1 [file 843a4d7fb5b1641b0bb8e3c2b2e75231-Supplemental.zip]

Archive with 4 entries (4 files):
- paper1-16.pdf
- __MACOSX/._paper1-16.pdf
- paper12-16.pdf
- __MACOSX/._paper12-16.pdf
